# Supplementary material for: Plant pathogenic fungus F. solani mediated biosynthesis of nanoceria: antibacterial and antibiofilm activity
Source: Royal Society of Chemistry journal article supplement (doi:10.1039/c6ra05003d), 2016-01-01
Supplement: c6ra05003d1.pdf [file c6ra05003d1.pdf]

## SUPPORTING INFORMATION

### Plant pathogenic fungus *F. solani* mediated biosynthesis of Nanoceria: Antibacterial and antibiofilm activity

5  
K.S. Venkatesh<sup>1</sup>, K. Gopinath<sup>2</sup>, N.S. Palani<sup>2</sup>, A. Arumugam<sup>2</sup>, Sujin P. Jose<sup>3</sup>, S. Asath Bahadur<sup>1</sup>, R. Ilangoan<sup>4\*</sup>.

Received (in XXX, XXX) Xth XXXXXXXXXX 20XX, Accepted Xth XXXXXXXXXX 20XX  
DOI: 10.1039/b000000x

10  
**Table S1. FTIR peaks and their respective assignment of functional groups**

| S. No | FTIR peak (cm <sup>-1</sup> ) | Functional groups                 |
|-------|-------------------------------|-----------------------------------|
| 1     | 3459                          | -OH stretching                    |
| 2     | 1657, 1229                    | Amides                            |
| 3     | 1348                          | C-N stretching of aromatic amines |
| 4     | 1073                          | -C-O-C                            |

25  
**Table S2. EDAX data of CeO<sub>2</sub> nanoparticles**

| Element | Weight% | Atomic% |
|---------|---------|---------|
| O K     | 23.08   | 72.44   |
| Ce L    | 76.92   | 27.56   |
| Totals  | 100.00  | 100     |

35

40

45

**Table S3. Comparison of antibacterial activity with the previous work**

5

| Sl. No               | Method         | Concentration | Bacteria             | ZOI(in mm)<br>mean ±SE | Ref.      |
|----------------------|----------------|---------------|----------------------|------------------------|-----------|
| 1                    | Well diffusion | 500µg/50 µl   | <i>E. coli</i>       | 2.67                   | 1         |
|                      |                | 1000µg/100 µl | <i>S. aureus</i>     | 1.67                   |           |
| 2                    | Disc diffusion | 2mg/ml        | <i>E. coli</i>       | 3                      | 2         |
| 3                    | Disc diffusion | 10mg/disc     | <i>E. coli</i>       | -                      | 3         |
|                      |                |               | <i>S. aureus</i>     | -                      |           |
|                      |                |               | <i>P. aeruginosa</i> | -                      |           |
|                      |                |               | <i>K. pneumoniae</i> | -                      |           |
|                      |                | 50mg/disc     | <i>E. coli</i>       | 3                      |           |
|                      |                |               | <i>S. aureus</i>     | 3.5                    |           |
|                      |                |               | <i>P. aeruginosa</i> | 3                      |           |
|                      |                |               | <i>K. pneumoniae</i> | 2.8                    |           |
|                      |                | 100mg/disc    | <i>E. coli</i>       | 4                      |           |
| <i>S. aureus</i>     | 5.5            |               |                      |                        |           |
| <i>P. aeruginosa</i> | 4.5            |               |                      |                        |           |
| <i>K. pneumoniae</i> | 4.5            |               |                      |                        |           |
| 4                    | Disc diffusion | 1mg/disc      | <i>E. coli</i>       | 2                      | This work |
|                      |                |               | <i>S. aureus</i>     | 5                      |           |
|                      |                |               | <i>P. aeruginosa</i> | 1                      |           |
|                      |                |               | <i>K. pneumoniae</i> | 3                      |           |
|                      |                | 3mg/disc      | <i>E. coli</i>       | 6                      |           |
|                      |                |               | <i>S. aureus</i>     | 6                      |           |
|                      |                |               | <i>P. aeruginosa</i> | 9                      |           |
|                      |                |               | <i>K. pneumoniae</i> | 7                      |           |
|                      |                | 5mg/disc      | <i>E. coli</i>       | 7                      |           |
| <i>S. aureus</i>     | 7              |               |                      |                        |           |
| <i>P. aeruginosa</i> | 10             |               |                      |                        |           |
| <i>K. pneumoniae</i> | 8              |               |                      |                        |           |

## References

- 10 1. M. Sastry, A. Ahmad, MI Khan and R. Kumar, *Curr. Sci.* 2003, **85**, 162.
2. R. Sanghi and P. Verma, *Bioresour. Tech.* 2009, **100**, 501.
3. M. Rajalakshmi, A.K. Arora, B.S. Bendre and S. Mahamuni *J. Appl. Phys.* 2000, **87**, 2445.
